# Supplementary material
Source: PubMed Central journal article supplement (PMC7965041)
Supplement: 4364_table.pdf [file 4364_table.pdf]

**On-line Table: Demographics, treatment, and outcome data for the 13 patients**

| Patient No. | Sex | Age (yr) | Vascular Risk Factors | Symptom-to-Door Time | Underlying Stenosis Site | No. of Retrieval Attempts | PTA/Stent | Pre-/Post-PTA/Stenting    |                   | Distal Embolization to Either the PCA or Cerebellar Arteries | Needle-to-Recanalization Time (min) | Door-to-Recanalization Time | NIHSS Score  |              | Ischemic Events at 90-Day Follow-Up |
|-------------|-----|----------|-----------------------|----------------------|--------------------------|---------------------------|-----------|---------------------------|-------------------|--------------------------------------------------------------|-------------------------------------|-----------------------------|--------------|--------------|-------------------------------------|
|             |     |          |                       |                      |                          |                           |           | Stenosis (%) <sup>a</sup> | TICI <sup>b</sup> |                                                              |                                     |                             | On Admission | At Discharge |                                     |
| 1           | M   | 54       | HT, DM                | 9 hr 55 min          | BA                       | 1                         | Apollo    | 90/70                     | 2a/3              | No                                                           | 90                                  | 3 hr 55 min                 | 22           | 14           | No                                  |
| 2           | M   | 64       | HT, smoker            | 2 hr                 | RV4                      | 1                         | PTA       | 90/40                     | 1/3               | No                                                           | 80                                  | 2 hr                        | 24           | 4            | No                                  |
| 3           | M   | 56       | HT, DM                | 9 hr 25 min          | BA                       | 1                         | PTA       | 95/50                     | 0/2b              | Yes                                                          | 50                                  | 3 hr                        | 19           | 6            | No                                  |
| 4           | M   | 55       | DM, HL                | 6 hr                 | RV4                      | 1                         | Wingspan  | 90/20                     | 2a/3              | No                                                           | 90                                  | 5 hr                        | 25           | 14           | No                                  |
| 5           | M   | 52       | HT, smoker            | 10 hr                | BA                       | 1                         | Wingspan  | 90/20                     | 2a/3              | No                                                           | 60                                  | 5 hr                        | 22           | 10           | No                                  |
| 6           | F   | 63       | HT, HL                | 10 hr 15 min         | BA                       | 2                         | PTA       | 90/40                     | 1/3               | Yes                                                          | 100                                 | 5 hr 30 min                 | 28           | 7            | No                                  |
| 7           | M   | 52       | HT, smoker            | 4 hr 5 min           | BA                       | 2                         | Wingspan  | 95/30                     | 1/3               | Yes                                                          | 140                                 | 5 hr                        | 25           | 11           | No                                  |
| 8           | M   | 51       | HT, DM                | 22 hr                | BA                       | 1                         | Wingspan  | 90/20                     | 2a/3              | No                                                           | 90                                  | 6 hr                        | 32           | 22           | No                                  |
| 9           | M   | 70       | HT, DM                | 5 hr 50 min          | BA                       | 1                         | Apollo    | 90/10                     | 0/2b              | Yes                                                          | 100                                 | 5 hr                        | 30           | 23           | No                                  |
| 10          | M   | 60       | HT, smoker            | 7 hr 30 min          | BA                       | 3                         | Wingspan  | 95/20                     | 1/3               | No                                                           | 140                                 | 4 hr                        | 27           | NA           | NA                                  |
| 11          | M   | 50       | HL, smoker            | 11 hr 55 min         | BA                       | 1                         | Apollo    | 90/10                     | 1/3               | Yes                                                          | 80                                  | 5 hr                        | 21           | 11           | No                                  |
| 12          | F   | 57       | HT, smoker            | 20 hr                | LV4                      | 2                         | Wingspan  | 95/20                     | 1/2b              | No                                                           | 120                                 | 6 hr 40 min                 | 34           | NA           | NA                                  |
| 13          | M   | 50       | HT, DM                | 8 hr                 | BA                       | 1                         | Wingspan  | 90/30                     | 1/3               | Yes                                                          | 70                                  | 4 hr                        | 29           | 8            | No                                  |

**Note:**—DM indicates diabetes mellitus; HL, hyperlipidemia; HT, hypertension; LV4, left vertebral artery V4 segment; RV4, right vertebral artery V4 segment; BA, basilar artery; PCA, posterior cerebral artery; NA, not applicable.

<sup>a</sup>“Pre-/Post PTA/Stenting Stenosis” and “Pre-/Post-PTA Stenting TICI” refer to the stenosis severity and TICI after mechanical thrombectomy but before PTA or stenting of the stenosis.
